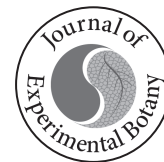

RESEARCH PAPER

# Unique photosynthetic phenotypes in *Portulaca* (Portulacaceae): C<sub>3</sub>-C<sub>4</sub> intermediates and NAD-ME C<sub>4</sub> species with Pilosoid-type Kranz anatomy

Elena V. Voznesenskaya<sup>1</sup>, Nuria K. Koteyeva<sup>1</sup>, Gerald E. Edwards<sup>2,\*</sup> and Gilberto Ocampo<sup>3</sup>

<sup>1</sup> Laboratory of Anatomy and Morphology, VL Komarov Botanical Institute of Russian Academy of Sciences, Prof. Popov Street 2, 197376, St. Petersburg, Russia

<sup>2</sup> School of Biological Sciences, Washington State University, Pullman, WA 99164-4236, USA

<sup>3</sup> Universidad Autónoma de Aguascalientes, Aguascalientes, Mexico

\* Correspondence: [edwardsg@wsu.edu](mailto:edwardsg@wsu.edu)

Received 21 July 2016; Editorial decision 5 October 2016; Accepted 18 October 2016

Editor: Robert Sharwood, Australian National University

## Abstract

**Portulacaceae is a family that has considerable diversity in photosynthetic phenotypes. It is one of 19 families of terrestrial plants where species having C<sub>4</sub> photosynthesis have been found. Most species in *Portulaca* are in the alternate-leaved (AL) lineage, which includes one clade (Cryptopetala) with taxa lacking C<sub>4</sub> photosynthesis and three clades having C<sub>4</sub> species (Oleracea, Umbraticola and Pilosa). All three species in the Cryptopetala clade lack Kranz anatomy, the leaves have C<sub>3</sub>-like carbon isotope composition and they have low levels of C<sub>4</sub> cycle enzymes. Anatomical, biochemical and physiological analyses show they are all C<sub>3</sub>-C<sub>4</sub> intermediates. They have intermediate CO<sub>2</sub> compensation points, enrichment of organelles in the centripetal position in bundle sheath (BS) cells, with selective localization of glycine decarboxylase in BS mitochondria. In the three C<sub>4</sub> clades there are differences in Kranz anatomy types and form of malic enzyme (ME) reported to function in C<sub>4</sub> (NAD-ME versus NADP-ME): Oleracea (Atriplicoid, NAD-ME), Umbraticola (Atriplicoid, NADP-ME) and Pilosa (Pilosoid, NADP-ME). Structural and biochemical analyses were performed on Pilosa clade representatives having Pilosoid-type leaf anatomy with Kranz tissue enclosing individual peripheral vascular bundles and water storage in the center of the leaf. In this clade, all species except *P. elatior* are NADP-ME-type C<sub>4</sub> species with grana-deficient BS chloroplasts and grana-enriched M chloroplasts. Surprisingly, *P. elatior* has BS chloroplasts enriched in grana and NAD-ME-type photosynthesis. The results suggest photosynthetic phenotypes were probably derived from an ancestor with NADP-ME-type C<sub>4</sub>, with two independent switches to NAD-ME type.**

**Key words:** C<sub>3</sub> plants, C<sub>3</sub>-C<sub>4</sub> intermediate, C<sub>4</sub> plants, chloroplast ultrastructure, immunolocalization, NAD-ME type, NADP-ME type, photosynthetic enzymes, *Portulaca*, Portulacaceae.

## Introduction

Most terrestrial plants have C<sub>3</sub>-type photosynthesis, in which there is direct fixation of atmospheric CO<sub>2</sub> via ribulose biphosphate carboxylase oxygenase (Rubisco) in all chloroplast-containing leaf mesophyll (M) tissues. Only ~3% of terrestrial plant species are C<sub>4</sub>, in which atmospheric CO<sub>2</sub> is fixed by phosphoenolpyruvate carboxylase (PEPC) located

Abbreviations: BS, bundle sheath;  $\delta^{13}\text{C}$  value, a measure of the carbon composition;  $\Gamma$ , CO<sub>2</sub> compensation point; GDC, glycine decarboxylase; M, mesophyll; NAD-ME, NAD-malic enzyme; NADP-ME, NADP-malic enzyme; PEPC, phosphoenolpyruvate carboxylase; PPK, pyruvate, Pi dikinase; PPF, photosynthetic photon flux density; Rubisco, ribulose biphosphate carboxylase oxygenase; VB, vascular bundle(s); WS, water storage tissue.

© The Author 2016. Published by Oxford University Press on behalf of the Society for Experimental Biology.

This is an Open Access article distributed under the terms of the Creative Commons Attribution License (<http://creativecommons.org/licenses/by/4.0/>), which permits unrestricted reuse, distribution, and reproduction in any medium, provided the original work is properly cited.

in M cells, with the production of initial compounds containing four carbon atoms. Through the CO<sub>2</sub> concentrating mechanism and repression of photorespiration, C<sub>4</sub> plants are recognized as having an increased capacity for carbon assimilation and higher efficiency in nitrogen and water use in warm climates. For this reason, there is interest in genetically modifying major C<sub>3</sub> crops with C<sub>4</sub> traits to reduce photorespiration (Brown, 1999; Sheehy *et al.*, 2007). The main structural difference associated with this pathway in most C<sub>4</sub> species is the specialized leaf anatomy (called Kranz type) with close coordination of function between two types of cells surrounding vascular bundles (VB), the enlarged chlorenchymatous bundle sheath (BS) cells and the radially arranged M cells (Edwards and Walker, 1983; Hatch, 1987; Kanai and Edwards, 1999, Edwards and Voznesenskaya, 2011). C<sub>4</sub> photosynthesis has been found in 19 families of angiosperm plants, 16 of which correspond to dicot lineages (Sage, 2004).

In the order Caryophyllales there are 23 families (Thorne and Reveal, 2007), eight of which have species with C<sub>4</sub> photosynthesis: Aizoaceae, Amaranthaceae, Caryophyllaceae, Gisekiaceae, Molluginaceae, Nyctaginaceae, Polygonaceae and Portulacaceae (Sage, 2004). Portulacaceae has 29 genera as traditionally circumscribed (Eggl, 2002), although it is currently considered as a family with only one genus, *Portulaca* (Nyffeler and Eggl, 2010; Hernández-Ledesma *et al.*, 2015), which is known to have C<sub>4</sub> species. Previous suggestions that some species of *Anacampseros* and *Grahamia* (once considered as members of Portulacaceae but now circumscribed in Anacampserotaceae) may be C<sub>4</sub> are not supported by a recent study (Guralnick *et al.*, 2008), which indicates the occurrence of Crassulacean acid metabolism (CAM) rather than C<sub>4</sub> photosynthesis in these genera.

For many years it was accepted that the genus *Portulaca* includes only species having Kranz-type anatomy and C<sub>4</sub> photosynthesis with two clear groups. One group was defined as having species with NAD-malic enzyme (NAD-ME)-type C<sub>4</sub> cycle and well-developed grana in BS cell chloroplasts, as in *P. oleracea* L. (Laetsch, 1971, 1974; Gutierrez *et al.*, 1974; Carolin *et al.*, 1978; Sprey and Laetsch, 1978). Another group was described as having NADP-malic enzyme (NADP-ME) subtype species with agranal BS chloroplasts, with *P. grandiflora* Hook. being a well-known representative species (Gutierrez *et al.*, 1974; Carolin *et al.*, 1978). This diversity was a stimulus for more complex studies of representative species in the genus. A structural and functional analysis showed the existence of four clearly distinct C<sub>4</sub> types of leaf anatomy, which differ in the way Kranz anatomy is formed with respect to the position of the VB (Voznesenskaya *et al.*, 2010). Phylogenetic analyses of the suborder Cactineae, which included genus *Portulaca*, showed the existence of two clearly defined clades; the opposite-leaved clade (OL), and the alternate-leaved clade (AL), mostly corresponding to two previously recognized subgenera, *Portulacella* and *Portulaca* (Ocampo and Columbus, 2010, 2012). There are two well-defined clades within the OL clade representing Australian and African-Asian species (Ocampo and Columbus, 2012). All representatives which have been studied in the OL clade have NADP-ME-type biochemistry, and a unique form of

leaf anatomy (Portulacelloid type) where Kranz is formed around individual VB, which are located towards the adaxial side of the leaf, with several layers of water storage (WS) cells located towards the abaxial side (Voznesenskaya *et al.*, 2010; Ocampo *et al.*, 2013). In the AL clade, from studies of representative species, there are four clades with differences in anatomy and forms of photosynthesis: Oleracea, Umbraticola, Pilosa and Cryptopetala. The Umbraticola clade is reported to have NADP-ME species with Atriplicoid-type anatomy where Kranz forms around individual veins in planar leaves. The Oleracea clade has NAD-ME-type C<sub>4</sub> species with a specific variant of Atriplicoid-type leaf anatomy (Voznesenskaya *et al.*, 2010). The Pilosa clade is reported to have NADP-ME-type C<sub>4</sub> species with Pilosoid-type anatomy in which Kranz tissue encloses individual peripheral VB with WS tissue located in the center of the leaf. In the Cryptopetala clade, which is sister to the Oleracea clade, one species, *P. cryptopetala*, was shown to be a C<sub>3</sub>-C<sub>4</sub> intermediate species (Voznesenskaya *et al.*, 2010); *P. hirsutissima* and *P. mucronata* are two other species in this clade which have C<sub>3</sub>-type carbon isotope composition, and from examination of leaf lamina of herbarium specimens, an apparent lack of Kranz anatomy (Ocampo *et al.*, 2013). Since evolution of C<sub>4</sub> from C<sub>3</sub> species is considered a stepwise process with intermediate states (Sage *et al.*, 2012), the goal of the present work was to fully characterize photosynthesis in species in clade Cryptopetala, and to analyze forms of photosynthesis in representative species in the under-studied Pilosa clade, which has a form of Kranz only found in Portulacaceae (Voznesenskaya *et al.*, 2010) and Aizoaceae (Bohley *et al.*, 2015).

## Materials and methods

### Plant material

The sources of seeds and plants of species in this study are provided in Table 1. All seeds were stored at 3–5 °C prior to use and were germinated on the surface of potting soil (Sunshine LC-1 from SUNGRO Horticulture, Bellevue, WA, USA) at 25 °C and a photosynthetic photon flux density (PPFD) of 100 μmol quanta m<sup>-2</sup> s<sup>-1</sup>. The seedlings were then transplanted to soil in 10 cm diameter pots (one seedling per pot). After ~1 week established plants were transferred to a greenhouse with day/night temperatures 26/18 °C and a maximum mid-day PPFD of 1000 μmol photosynthetic quanta m<sup>-2</sup> s<sup>-1</sup>. Plants were fertilized once per week with Peter's Professional (20:20:20; Scotts Miracle-Gro). For microscopy and biochemical analyses, samples of mature leaves were taken from ~2-month-old plants. Cotyledons were fixed ~2 weeks after germination when the first leaves were already established.

### Light and electron microscopy

Hand cross sections of fresh leaves were placed in water and studied under UV light (with DAPI filter) on a Leica Fluorescence Microscope Leica DMFSA (Leica Microsystems Wetzlar GmbH, Germany).

For structural studies, two to three samples were taken from three plants for each species from cotyledons and the middle part of the leaf. They were fixed at 4 °C in 2% (v/v) paraformaldehyde and 2% (v/v) glutaraldehyde in 0.1 M phosphate buffer (pH 7.2), postfixed in 2% (w/v) OsO<sub>4</sub> and then, after a standard acetone dehydration procedure, embedded in Spurr's epoxy resin. Cross sections were made on a Reichert Ultracut R ultramicrotome (Reichert-Jung

**Table 1.** The source of seeds and carbon isotope composition,  $\delta^{13}\text{C}$ , for mature leaves. For  $\delta^{13}\text{C}$  analysis the minimum is n=2

| Species                                           | Source of plants                                                                                                                             | $\delta^{13}\text{C}$ ,<br>‰ |
|---------------------------------------------------|----------------------------------------------------------------------------------------------------------------------------------------------|------------------------------|
| <b>Aizoaceae</b>                                  |                                                                                                                                              |                              |
| <i>Sesuvium portulacastrum</i> (L.) L.            | Cuttings from Honolulu, Hawaii, USA                                                                                                          | -29.5 ± 0.07*                |
| <b>Cryptopetala clade</b>                         |                                                                                                                                              |                              |
| <i>P. cryptopetala</i> Speg.                      | Ulm Botanical Garden, Germany                                                                                                                | -28.6 ± 0.16                 |
|                                                   | 2009/474 IPEN UY)-ULM-2008-G-82 (Sukkulenzammlung Zürich, from Uruguay, Negro Ruta, Nyffeler & Eggli), (under the name <i>P. fluvialis</i> ) |                              |
| <i>P. hirsutissima</i> Cambess.                   | Plants provided by R. Nicholson, Smith College, Northampton, MA                                                                              | -26.9 ± 0.08                 |
| <i>P. mucronata</i> Link.                         | Seeds provided by G. Pinna-de-Melo, Universidade de São Paulo, São Paulo, Brazil                                                             | -26.6 ± 0.54                 |
| <b>Oleracea clade</b>                             |                                                                                                                                              |                              |
| <i>P. molokiniensis</i> Hobby                     | Seeds provided by F. Okamoto, Pearl City, Hawaii                                                                                             | -15.4 ± 0.37*                |
| <i>P. oleracea</i> L.                             | Seeds were collected in Pullman, WA                                                                                                          | -14.0 ± 0.83*                |
| <b>Umbraticola clade</b>                          |                                                                                                                                              |                              |
| <i>P. umbraticola</i> Kunth. cv. 'wildfire mixed' | Philippines, plant market                                                                                                                    | -13.5 ± 0.29*                |
| <b>Pilosa clade</b>                               |                                                                                                                                              |                              |
| <i>P. amilis</i> Speg.                            | Royal Botanic Gardens, Kew, #6541                                                                                                            | -13.5 ± 0.03*                |
| <i>P. biloba</i> Urb.                             | Seeds from J. Matthews (Carter and Snow 21355a, herbarium UAA)                                                                               | -13.8 ± 0.08                 |
| <i>P. elatior</i> Mart. ex Rohrb.                 | Seeds provided by G. Pinna-de-Melo, Universidade de São Paulo, São Paulo, Brazil                                                             | -13.0 ± 0.08                 |
| <i>P. cf. gilliesii</i> Hook.                     | Plants provided by R. Nicholson, Smith College, Northampton, MA                                                                              | -17.4 ± 0.01                 |
| <i>P. grandiflora</i> Hook.                       | Lilly Miller, The Chas. H. Lilly Co., Portland, OR                                                                                           | -12.1 ± 0.57*                |
| <i>P. halimoides</i> L.                           | Seeds provided by R. Nicholson, Smith College, Northampton, MA                                                                               | -16.6 ± 1.36                 |
| <i>P. smallii</i> P. Wilson                       | Seeds from G. Ocampo (Matthews and Luckenbaugh s.n., 30 Aug 2013, herbarium UAA)                                                             | -13.9 ± 0.25                 |
| <i>P. suffrutescens</i> Engelm.                   | Seeds from USDA PI674272                                                                                                                     | -13.2 ± 0.38                 |

\*Data from (Voznesenskaya et al., 2010)

GmbH, Heidelberg, Germany). For light microscopy, semi-thin sections were stained with 1% (w/v) Toluidine blue O in 1% (w/v) Na<sub>2</sub>B<sub>4</sub>O<sub>7</sub> and studied under the Olympus BH-2 (Olympus Optical Co., Ltd.) light microscope equipped with LM Digital Camera & Software (Jenoptik ProgRes Camera, C12plus, Jena, Germany). Ultra-thin sections were stained for transmission electron microscopy with 4% (w/v) uranyl acetate followed by 2% (w/v) lead citrate. FEI Tecnai G2 (Field Emission Instruments Company, Hillsboro, OR, USA) equipped with Eagle FP 5271/82 4K HR200KV digital camera and Hitachi H-600 (Hitachi Scientific Instruments, Tokyo, Japan) transmission electron microscopes were used for observation and photography.

Observations of vascular pattern were obtained from fully expanded leaves. The samples were cleared in 70% ethanol (v/v) until chlorophyll was removed, treated with 5% (w/v) NaOH overnight and then rinsed three times in water. At least five leaves from two or three different plants were used. The leaves were mounted in water and examined under UV light (with DAPI filter) on a Fluorescence Microscope Leica DMFSA (Leica Microsystems Wetzlar GmbH, Germany) using autofluorescence of lignified tracheary elements of the xylem. The density of the venation (mm per mm<sup>2</sup> of the leaf surface area) was determined as the length of minor or peripheral veins per leaf area which were measured using the image analysis program ImageJ 1.37v (Wayne Rasband, National Institutes of Health, USA). Standard errors were determined and analysis of variance (ANOVA) was performed with Statistica 7.0 software (StatSoft, Inc.). Tukey's HSD (honest significant difference) test was used to analyze differences between vein density values in *Portulaca* species. All analyses were performed at the 95% significance level.

#### In situ immunolocalization

Leaf samples (two to three samples from three plants for each species) were fixed at 4 °C in 2% (v/v) paraformaldehyde and 1.25% (v/v) glutaraldehyde in 0.05 M PIPES buffer, pH 7.2. The samples

were dehydrated with a graded ethanol series and embedded in London Resin White (LR White, Electron Microscopy Sciences, Fort Washington, PA, USA) acrylic resin. The antibody used (raised in rabbit) was against the P subunit of mitochondrial glycine decarboxylase (GDC) IgG from *Pisum sativum* L. (courtesy of Dr David Oliver). Preimmune serum was used as a control.

For transmission electron microscopy immunolabeling, thin sections (~70–90 nm) on Formvar-coated nickel grids were incubated for 1 h in TBST+BSA to block non-specific protein binding on the sections. They were then incubated for 3 h with either the preimmune serum diluted in TBST+BSA or anti-GDC (1:10) antibodies. After washing with TBST+BSA, the sections were incubated for 1 h with Protein A-gold (15 nm) diluted 1:100 with TBST+BSA. The sections were washed sequentially with TBST+BSA, and TBST and distilled water, and then post-stained with a 1:3 dilution of 0.5% (w/v) potassium permanganate and 2% (w/v) uranyl acetate. Images were collected using a FEI Tecnai G2 transmission electron microscope. The density of labeling was determined by counting the gold particles on electron micrographs and calculating the number per unit area (µm<sup>2</sup>) in the mitochondria, versus background labeling density in the rest of the cell. For each cell type, replicate measurements were made on parts of cell sections (n=10–60 images from at least two different experiments).

#### Western blot analysis

Total proteins were extracted from leaves by homogenizing 0.2 g of tissue in 0.2 ml of extraction buffer (100 mM Tris-HCl, pH 7.5, 10 mM (w/v) MgCl<sub>2</sub>, 1 mM (w/v) EDTA, 15mM (v/v) β-mercaptoethanol, 20% (v/v) glycerol and 1mM phenylmethylsulfonyl fluoride). Extraction was continued by adding 0.3 ml 60 mM Tris-HCl, pH 7.5, 4% (w/v) SDS, 20% (v/v) glycerol, 0.5% (v/v) β-mercaptoethanol and 0.1% (w/v) bromphenol blue. After boiling for 5 min for SDS-PAGE the supernatant was collected after centrifugation at 14000 ×g for 5 min and protein concentration was determined with an RCDC protein quantification kit (Bio-Rad, Hercules, CA, USA), which



tolerates detergents and reducing agents. Protein samples (20 µg) were separated by 10% SDS-PAGE, blotted onto nitrocellulose, and probed with anti-*Amaranthus hypochondriacus* NAD-ME IgG which was prepared against the 65 KDa  $\alpha$  subunit, courtesy of J. Berry (Long and Berry, 1996) (1:2000), anti-*Zea mays* 62 KDa NADP-ME IgG, courtesy of C. Andreo (Maurino et al., 1996) (1:2500), commercially available anti-*Zea mays* PEPC IgG (1:100 000) (Chemicon, Temecula, CA, USA), anti-*Zea mays* pyruvate, Pi dikinase (PPDK) IgG, courtesy of T. Sugiyama (1:50 000), overnight at 4 °C. Goat anti-rabbit IgG-alkaline phosphatase conjugate antibody (Bio-Rad) was used at a dilution of 1:20000 for detection. Bound antibodies were localized by developing the blots with 20 mM nitroblue tetrazolium and 75 mM 5-bromo-4-chloro-3-indolyl phosphate in detection buffer (100 mM Tris-HCl, pH 9.5, 100 mM NaCl, 5 mM MgCl<sub>2</sub>). The intensities of bands in western blots were quantified with an image analysis program (ImageJ 1.37v) and expressed relative to mean level in seven C<sub>4</sub> species, which was set at 100%.

#### Measurements of rates of photosynthesis

Gas exchange was measured using the LI-6400XT portable photosynthesis system equipped with broadleaf chamber (LI-6400-02B) in response to varying CO<sub>2</sub> at 1000 µmol quanta m<sup>-2</sup> s<sup>-1</sup> PPFD and 25 °C and in response to varying light intensity at 400 µbar CO<sub>2</sub> and 25 °C. Measurements were performed in greenhouse with enclosing of one leaf or leaf portion inside of chamber. For each experiment the leaves were illuminated with 1000 PPFD under 400 µbar CO<sub>2</sub> and 25 °C until a steady state rate of CO<sub>2</sub> fixation was obtained (generally 30 min). For varying CO<sub>2</sub> experiments the CO<sub>2</sub> level was decreased, and then increased up to 2000 µbar at 5 min intervals. For varying light experiments, measurements were made beginning at 2000 PPFD, with decreasing levels at 4 min intervals. The CO<sub>2</sub> compensation point ( $\Gamma$ ) was determined by extrapolating the initial slope of CO<sub>2</sub> response curve through the  $x$ -axis and taking the zero intercept. The leaf area was calculated from digital image of the leaf portion enclosed in the chamber, using an image analysis program (ImageJ 1.37v).

#### $\delta^{13}\text{C}$ values

$\delta^{13}\text{C}$  values, a measure of the carbon isotope composition, were determined at Washington State University on leaf samples taken from plants using a standard procedure relative to PDB (Pee Dee Belemnite) limestone as the carbon isotope standard (Bender et al., 1973). Plant samples were dried at 80 °C for 24 h, milled to a fine powder and then 1–2 mg were placed into a tin capsule and combusted in a Eurovector elemental analyzer. The resulting N<sub>2</sub> and CO<sub>2</sub> gases were separated by gas chromatography and admitted into the inlet of a Micromass Isoprime isotope ratio mass spectrometer (IRMS) for determination of <sup>13</sup>C/<sup>12</sup>C ratios.  $\delta^{13}\text{C}$  values were calculated where  $\delta^{13}\text{C} = 1000 \times (R_{\text{sample}}/R_{\text{standard}}) - 1$ , where  $R = ^{13}\text{C}/^{12}\text{C}$ .

#### C<sub>4</sub> biochemical-type evolution

A combined data matrix of chloroplast and nuclear DNA sequences was prepared from the data used by Ocampo and Columbus (2010, 2012) and Ocampo et al. (2013) to obtain an evolutionary framework to estimate C<sub>4</sub> variant diversification within Portulacaceae. Sampling included species of *Portulaca* with known C<sub>4</sub> biochemical types. Sequences were aligned using MUSCLE version 3.7 (Edgar, 2004), followed by manual alignment in MEGA version 7.0.14 (Kumar et al., 2016). The combined data matrix was partitioned by locus and analyzed under maximum likelihood (ML; Felsenstein, 1973) in RA×ML version 7.2.6 (Stamatakis, 2006) under the GTRGAMMA model. Clade support was calculated by nonparametric bootstrapping (Felsenstein, 1985) from 10 000 replicates performed simultaneously with the ML search using the ‘-f a’ option. The phylogenetic analysis was executed using the High Performance Computing Cluster at the California Academy of Sciences. Evolution of C<sub>4</sub> biochemical types was estimated by ML over the ML tree using

Mesquite version 3.04 (Maddison and Maddison, 2016) under the Markov k-state 1 parameter model (Lewis, 2001).

## Results

### Carbon isotope composition of leaves

The carbon isotope values of leaves of the three *Portulaca* species in the Cryptopetala clade, *P. cryptopetala*, *P. hirsutissima* and *P. mucronata*, were all C<sub>3</sub>-like ( $\delta^{13}\text{C} -26.6$  to  $-28.6\text{‰}$ ). In all species in the Pilosa clade that were analyzed the values were in the range of C<sub>4</sub> plants ( $-12.1$  to  $-17.4\text{‰}$ ) (Table 1).

### General view of plants and leaf structure

Figure 1 shows the general view of representative *Portulaca* species that were analyzed in the most detail in this study. Two of the species, *P. cryptopetala* (Fig. 1A) and *P. mucronata* (Fig. 1D) have flattened leaves, while *P. hirsutissima* (Fig. 1G) has thicker and more succulent terete (terete means succulent circular or distorted circle shape) leaves. All three species clearly have C<sub>3</sub>-like dorsoventral type of anatomy with vascular bundles (VB) situated under the palisade layers, in the medium part of leaf lamina between palisade and spongy parenchyma (Fig. 1B, C, E, F, H, I). In two species, *P. cryptopetala* and *P. mucronata* there are two layers of palisade parenchyma on the adaxial side and three to four layers of spongy parenchyma cells on the abaxial side; the VB are surrounded by BS cells (Fig. 1C, F). The general leaf anatomy in *P. hirsutissima* (Fig. 1I) is similar except for the intensive development of spongy water storage (WS) parenchyma in the middle part of the leaf (Fig. 1I). In all three species the BS cells around lateral VB are rather large; but, their size is similar to the surrounding M cells (Fig. 1C, F, I).

In *P. cryptopetala* and *P. mucronata*, the main vein is located in the same plane as all lateral VBs (not shown); however; in *P. hirsutissima* the main vein is well below the lateral veins and it is surrounded by spongy WS parenchyma (Fig. 1H).

Representative species from the Pilosa clade (*P. biloba*, *P. cf. gilliesii*, *P. elatior*, *P. halimoides*, *P. smallii* and *P. suffrutescens*) have lanceolate semi-terete or cylindrical fleshy leaves with Kranz anatomy of Pilosoid type. As illustrated with *P. elatior* (Fig. 1K, L), in this type of anatomy the VB are distributed around the leaf periphery with each individual vein surrounded by two specialized chlorenchyma layers characteristic of Kranz-type anatomy. The main vein is located more or less in the center of the leaf and is surrounded by WS tissue.

### Transmission electron microscopy

In three species, *P. cryptopetala*, *P. hirsutissima* and *P. mucronata*, the BS cells contain a significant number of organelles in the centripetal position, adjacent to VB and along the radial cell walls (Fig. 2A, D, G). M and BS chloroplasts in all three species have a similar level of grana development with medium-sized grana (Fig. 2B, C, E, F, H, I). BS cells contain numerous centripetally arranged enlarged mitochondria (Fig. 2A, D, G).

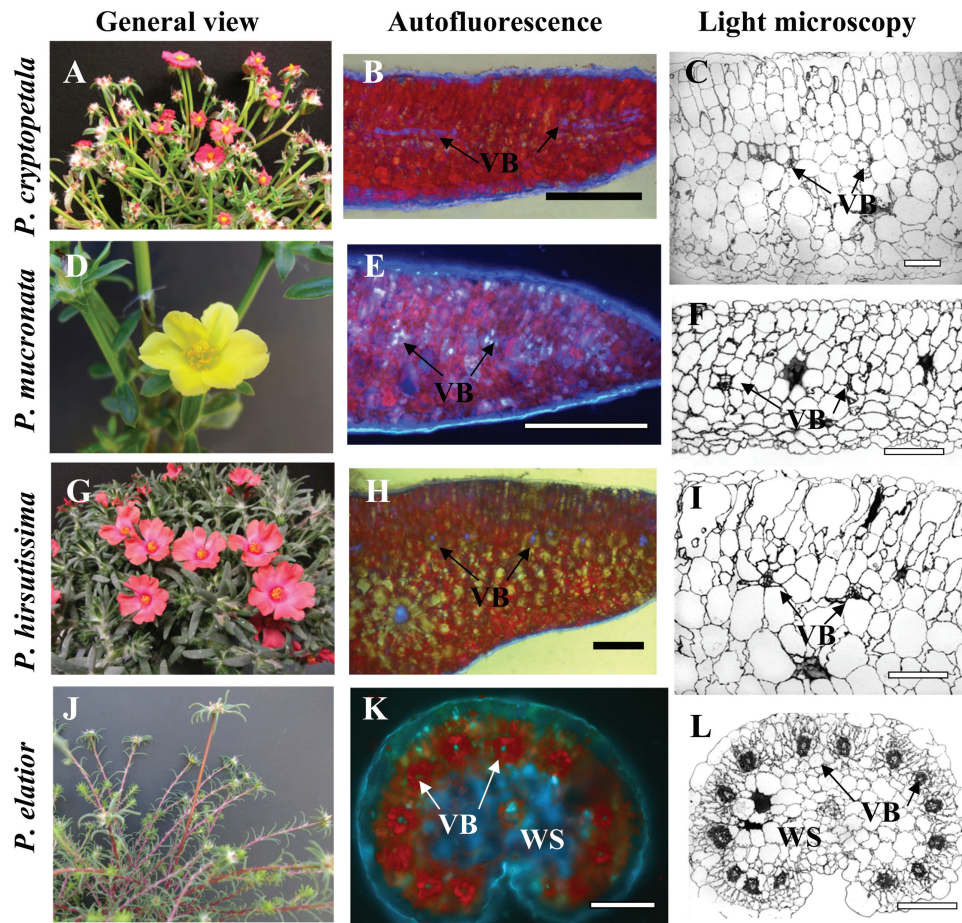

**Fig. 1.** General view of *Portulaca* species (left panels, A, D, G, J), distribution of chlorophyll autofluorescence under the fluorescent microscope (middle panels, B, E, H, K), and light microscopy of leaf cross sections (right panels, C, F, I, L). *P. cryptopetala* (B, C), *P. mucronata* (E, F) and *P. hirsutissima* (H, I), all have C<sub>3</sub> like dorsoventral type leaf anatomy. In *P. cryptopetala* and *P. mucronata* (B, C, E, F), all vascular bundles (VB), including the main vein, are distributed in the median paradermal plane; red fluorescence from chlorophyll is distributed more or less evenly through the leaf mesophyll (B, E). In *P. hirsutissima* (H, I), VB are positioned close to the adaxial side while the main vein is in the center of the leaf below lateral veins; red chlorophyll fluorescence is concentrated in the adaxial palisade mesophyll layers with water storage (WS) spongy mesophyll cells in the middle of the leaf (H). *P. elatior* has Pilosoid type of anatomy (K, L) with peripheral distribution of VB with each vein surrounded by two Kranz chlorophyll layers; WS tissue is around the main vein. VB, vascular bundles; WS, water storage tissue. Scale bars: 1 mm for B; 200  $\mu$ m for C, F, I, L; 0.5 mm for E, H, K.

In all six species with Pilosoid Kranz-type leaf anatomy, the BS cells surrounding the minor veins contain numerous organelles in a centripetal position (illustrated in *P. smallii* and *P. elatior*, Fig. 2J, M). A more detailed study of M and BS ultrastructure revealed significant differences. In five species (*P. biloba*, *P. cf. gilliesii*, *P. halimoides*, *P. smallii* and *P. suffrutescens*), the BS cells contain nearly agranal chloroplasts while M chloroplasts have rather well-developed grana as shown for *P. smallii* in Fig. 2K, L. However, one species, *P. elatior*, has a reverse type of chloroplast ultrastructure; the chloroplasts in the BS cells have numerous mid-sized grana (Fig. 2N) while the M chloroplasts have a more extensive single thylakoid system (Fig. 2O). This species also has numerous large mitochondria with specific tubular cristae in BS cells (Fig. 2N).

#### Vein density

The vein density in the three species in the Cryptopetala clade (*P. cryptopetala*, *P. hirsutissima* and *P. mucronata*) which lack Kranz anatomy was analyzed in comparison to Kranz-type species including *P. umbraticola* with Atriplicoid leaf anatomy

from Umbraticola clade, two species in the Oleracea clade with modified Atriplicoid-type anatomy (*P. molokiniensis* and two varieties of *P. oleracea*) and three species in the Pilosa clade with Pilosoid-type anatomy (*P. amilis*, *P. biloba* and *P. grandiflora*) (Fig. 3). Among these, in general species in the Cryptopetala clade had the lowest vein density while the highest vein densities were in the two species in the Oleracea clade (vein density ~1.8-fold higher than the Cryptopetala species). In the species in the Pilosa clade, the vein densities on the adaxial side of leaves were on average ~1.3-fold higher than the Cryptopetala species. *Portulaca umbraticola* had high vein density, appearing to be intermediate between Pilosa and Oleracea clades. The three species with Pilosoid Kranz-type leaf anatomy showed similar vein densities on the adaxial leaf side while the densities in the two species with flattened leaves (*P. amilis* and *P. biloba*) were 1.2 and 1.7 times lower on the abaxial leaf side.

#### Cotyledon anatomy

The species in the Cryptopetala clade, *P. cryptopetala*, *P. hirsutissima* and *P. mucronata*, have cotyledons with C<sub>3</sub>-like



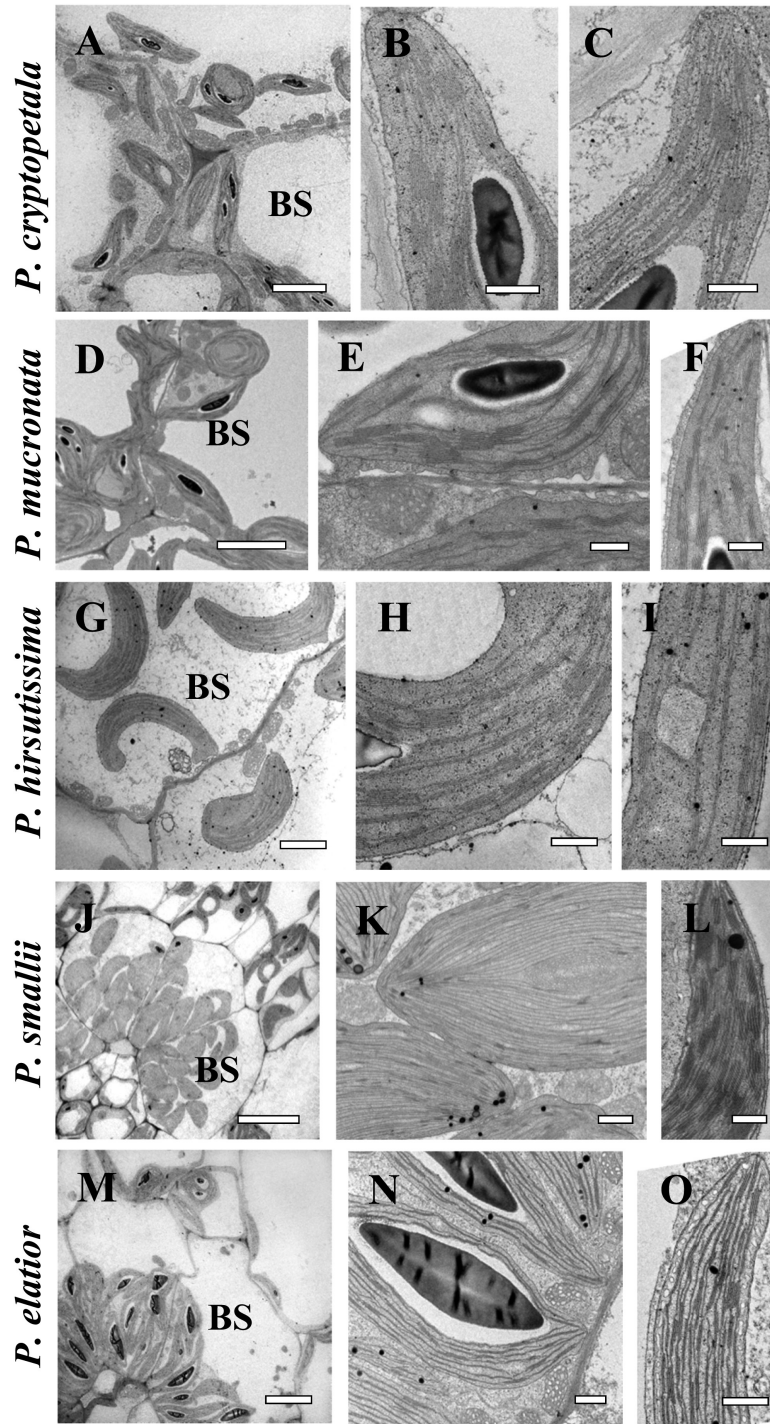

**Fig. 2.** Electron microscopy of bundle sheath (BS) cells (A, D, G, J, M), and chloroplasts in BS (B, E, H, K, N) and mesophyll (M) (C, F, I, L, O) cells in representative *Portulaca* species. *P. cryptopetala* (A–C), *P. mucronata* (D–F), *P. hirsutissima* (G–I), *P. smallii* (J–L), and *P. elatior* (M–O). Panels (A, D, G, J, M) show the distribution of organelles in BS cells in centripetal position. In panels (B, E, H, N) the BS chloroplasts have well-developed grana, while BS chloroplasts in *P. smallii* (K) are grana-deficient. In contrast to the developed grana in M chloroplasts in (C, F, I and L), panel O shows grana-deficient M chloroplasts in *P. elatior*. Panel N illustrates occurrence of mitochondria around BS chloroplasts. BS, bundle sheath; M, mesophyll. Scale bars: 5  $\mu\text{m}$  for A, D, G, M; 20  $\mu\text{m}$  for J; 1  $\mu\text{m}$  for K; 0.5  $\mu\text{m}$  for B, C, E, F, H, I, L, N, O.

dorsoventral anatomy, with one to two layers of palisade-like M cells on the adaxial side and several layers of spongy M cells towards the abaxial side (Fig. 4A–C). The number of spongy parenchyma layers varies between species: from one or two layers in *P. cryptopetala* and *P. mucronata* to mostly three in semi-terete cotyledons of *P. hirsutissima* with a little

thicker mid-section. VB are distributed in a lateral plane in the central part of the lamina in *P. cryptopetala* and *P. mucronata* (Fig. 4A, C) and they are located closer to the adaxial side of the lamina under the palisade parenchyma in *P. hirsutissima* (Fig. 4B). In all three species the VB are surrounded by rather large BS cells with a higher density of organelles

(chloroplasts and mitochondria) in the centripetal position or along the radial cell walls, similar to that described for leaves (structural analysis by TEM is not shown).

The cotyledons in five studied species in the Pilosa clade with Kranz-type anatomy in leaves (*P. biloba*, *P. elatior*, *P. halimoides*, *P. smallii* and *P. suffrutescens*) all have Atriplicoid-like Kranz anatomy with VB distributed in one lateral plane (illustrated only for *P. elatior* and *P. smallii*, Fig. 4D, E). The VB surrounded by two layers of Kranz chlorenchyma are located under the adaxial epidermis, with variable number of spongy parenchyma layers towards the abaxial epidermis, from one layer in *P. elatior* to mostly two layers in *P. biloba*, *P. halimoides* and *P. suffrutescens*. In *P. smallii* the VB are located closer to the adaxial side of the lamina with three/four layers of spongy parenchyma cells on the adaxial side of the cotyledon (Fig. 4E).

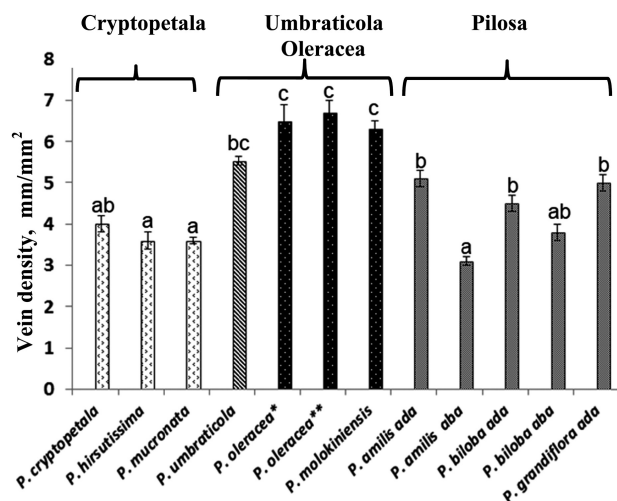

**Fig. 3.** Graph showing the density of venation in representative *Portulaca* species. For two species, *P. amilis* and *P. biloba*, vein density is shown for both sides of the leaf, adaxial and abaxial (ada and aba on graph). For *P. oleracea*, two accessions were studied: \*, seeds from Pullman, WA, USA; and \*\*, seeds from USDA PI 0121921.  $n \geq 10$ . Different letters indicate significant differences between species and leaf sides,  $P \leq 0.05$ .

#### Immunolabeling for GDC

In situ immunolabeling for GDC was performed for *P. cryptopetala*, *P. hirsutissima* and *P. mucronata* in the Cryptopetala clade in comparison to the C<sub>4</sub> species *P. oleracea* (Fig. 5; Supplementary Fig. S1 at JXB online). Analysis of the density of immunogold particles for anti-GDC antibody shows strong selective localization in BS mitochondria (~10-fold higher than in M mitochondria) in *P. oleracea*. Similarly, in all three species, *P. cryptopetala*, *P. hirsutissima* and *P. mucronata*, there is clear selective labeling for GDC in BS mitochondria (Fig. 5). Supplementary Fig. S1 shows electron microscopy images of the immunolabeling for anti-GDC antibody, where it is selectively localized in BS mitochondria in *P. oleracea* and the C<sub>3</sub>-C<sub>4</sub> intermediates, while in the C<sub>3</sub> species *Sesuvium portulacastrum* there is similar density of labeling in mitochondria in M and BS cells (Fig. 5).

#### Western blot analysis

Immunoblots are shown for photosynthetic enzymes of the C<sub>4</sub> cycle, PEPC, PPDK, NAD-ME and NADP-ME, from total proteins extracted from leaves of *Portulaca* species (Fig. 6). In the three species in the Cryptopetala clade, (*P. cryptopetala*, *P. hirsutissima* and *P. mucronata*) the labeling for C<sub>4</sub> cycle enzymes PEPC and PPDK was much lower than in the other species all of which have Kranz anatomy. Analyses of the relative band densities (measured by Image J) showed the density of labeling in the intermediates for PEPC was 7–15% and for PPDK was 14–20% compared to the mean value for the seven C<sub>4</sub> species. The three species from the Cryptopetala clade had lower labeling for NAD-ME-type enzyme compared to the NAD-ME species *P. elatior* and *P. oleracea*, and no detectable labeling for NADP-ME (Fig. 6). Among the other species, five are in the Pilosa clade (*P. biloba*, *P. cf. gilliesii*, *P. elatior*, *P. halimoides*, *P. smallii* and *P. suffrutescens*), while the other, *P. oleracea*, is in the Oleracea clade. With respect to C<sub>4</sub> decarboxylases, all species from the Pilosa clade have high labeling for NADP-ME with the exception of

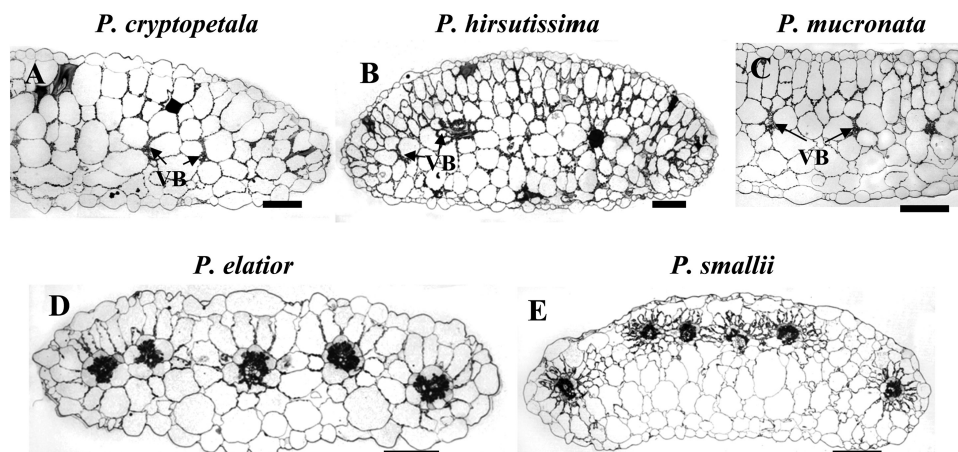

**Fig. 4.** Light micrographs showing cross sections of cotyledons for five *Portulaca* species. Three species have dorsoventral cotyledon anatomy: *P. cryptopetala* (A), *P. hirsutissima* (B), *P. mucronata* (C). Note the enlarged number of organelles in bundle sheath cells of these species (most obvious in *P. mucronata*). *P. elatior* (D) and *P. smallii* (E) have cotyledons with Atriplicoid Kranz-type anatomy. VB, vascular bundle. Scale bars, 200  $\mu\text{m}$ .



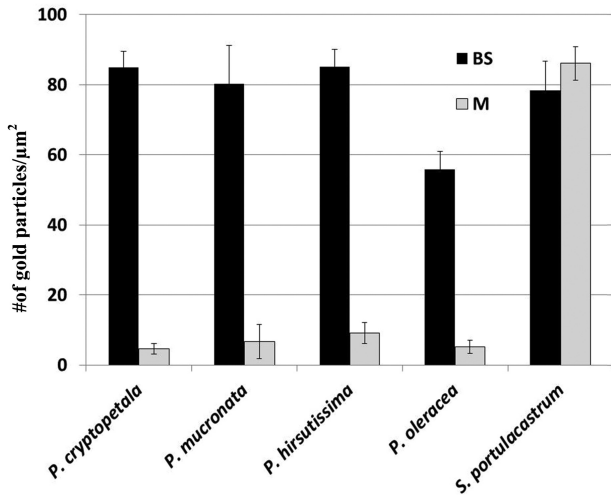

**Fig. 5.** Density of immunogold labeling of GDC in mitochondria of mesophyll (M) and bundle sheath (BS) cells of four species of *Portulaca* and *Sesuvium portulacastrum* as  $C_3$  control. Shown is the number of gold particles per  $\mu\text{m}^2$  of mitochondria.  $n \geq 10$ .

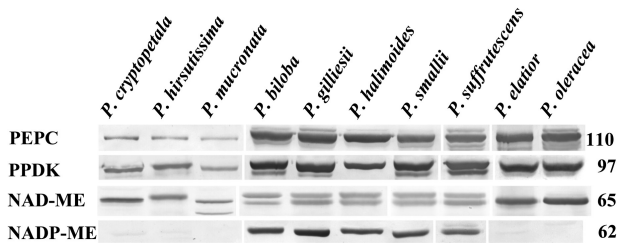

**Fig. 6.** Western blots for four  $C_4$  pathway enzymes from total proteins extracted from leaves of ten *Portulaca* species. Blots were probed with antibodies raised against PEPC, PPK, NAD-ME and NADP-ME. Numbers at the right indicate molecular mass in kilodaltons. The originals were modified to group species according to the presentation (vertical lines); there were no selective changes in positions or densities of bands on the membrane. The reason for labeling of two bands in some species with the antibody for NAD-ME (prepared against *A. hypochondriacus*  $\alpha$ -NAD-ME) is not known. It may represent the expression of two isoforms of the  $\alpha$ -NAD-ME, or the antibody may have low reactivity with the smaller subunit  $\beta$ -NAD-ME in some species (see Murata et al., 1989; Tronconi et al., 2008; Maier et al., 2011).

*P. elatior*; it has high labeling for NAD-ME and no detectable labeling for NADP-ME, which is similar to *P. oleracea*.

### Gas exchange analysis

Gas exchange analyses were made to compare photosynthetic features of species in the Cryptopetala clade with a representative  $C_4$  species, *P. oleracea*. The response of photosynthesis to varying intercellular levels of  $\text{CO}_2$  were measured under 1000 PPFD, 25 °C and atmospheric  $\text{O}_2$  (21%). With increasing levels of  $\text{CO}_2$ , there was a rapid increase in photosynthesis in *P. oleracea* with near saturation at  $\sim 200 \mu\text{bar}$   $\text{CO}_2$ , whereas *P. cryptopetala*, *P. hirsutissima* and *P. mucronata* show strong a continual increase in photosynthesis up to 800–1000  $\mu\text{bar}$   $\text{CO}_2$  with very similar rates under high  $\text{CO}_2$  (Fig. 7A). When photosynthesis was measured under near current atmospheric levels of  $\text{CO}_2$ , 400  $\mu\text{bar}$  (with resulting  $C_i$  values  $\sim 200$ –250  $\mu\text{bar}$ ), the rate of photosynthesis was higher in *P.*

*oleracea* than in the other three species. The  $\text{CO}_2$  compensation points ( $\Gamma$ ) determined from extrapolation of the initial slopes of the response curve, was 2.6  $\mu\text{bar}$  for *P. oleracea*, while values in the Cryptopetala species *P. cryptopetala* and *P. hirsutissima* were  $\sim 30 \mu\text{bar}$ , and in *P. mucronata*  $\Gamma$  was 20  $\mu\text{bar}$  (Fig. 7B). In light response curves, at 400  $\mu\text{bar}$   $\text{CO}_2$  and 25 °C, the response of photosynthesis was similar among the species (Fig. 7C). In the Cryptopetala species photosynthesis reaches saturated rates at  $\sim 1100$  PPFD while there was some marginal increase in rates in *P. oleracea* up to 2000 PPFD. The maximum rates at 2000 PPFD in *P. hirsutissima* and *P. mucronata* were similar, and significantly ( $P < 0.05$ ) lower than in *P. cryptopetala* and *P. oleracea* (Fig. 7C).

### Evolution of $C_4$ biochemical types

The sampling for the phylogenetic analysis included 16 *Portulaca* species with known  $C_4$  biochemical types (see Voznesenskaya et al., 2010; Ocampo et al., 2013; this study) and three representatives of close-related taxa as outgroup (Table 2). Relationships within *Portulaca* follow those obtained by Ocampo and Columbus (2012), where the genus and the relations among major clades are well supported (Fig. 8). The analysis shows the NADP-ME biochemical variant is the ancestral  $C_4$  type for *Portulaca*. It predicts that there were two independent switches to the NAD-ME type, one in the ancestor of the Oleracea clade and one in *P. elatior* (earliest divergent lineage of the Pilosa clade). The  $C_3$ - $C_4$  condition originated only once in the ancestor of the Cryptopetala clade.

## Discussion

In this study on species which belong to the AL clade of *Portulaca*, the focus was on clades Pilosa and Cryptopetala. *Portulaca biloba*, *P. cf. gilliesii*, *P. elatior*, *P. halimoides*, *P. smallicii* and *P. suffrutescens* are from the Pilosa clade, and they all have  $C_4$ -type carbon isotope ratios (this study; Ocampo et al., 2013). The discovery that this clade has not only NADP-ME species, but also an NAD-ME type  $C_4$  (*P. elatior*, which is widely distributed from the Caribbean to Venezuela and Brazil) provides insight into diversity in evolution of forms of  $C_4$  in the genus. The Cryptopetala clade, which is composed of *P. cryptopetala*, *P. hirsutissima* and *P. mucronata*, is the only lineage that has species with  $C_3$ -type carbon isotope ratios (Table 1, Ocampo et al., 2013); in this study all three species are shown to be  $C_3$ - $C_4$  intermediates.

### Evolutionary trends in anatomy

#### Leaf anatomy

Among the three intermediate *Portulaca* species in the Cryptopetala clade, *P. cryptopetala* and *P. mucronata* are sister species, while *P. hirsutissima* is an early-divergent (see Fig. 8). The former two species have rather succulent, flattened leaves, while *P. hirsutissima* has terete leaves with a thicker central part. This is consistent with differences in structure: *P. cryptopetala* and *P. mucronata* have broad leaves with VB



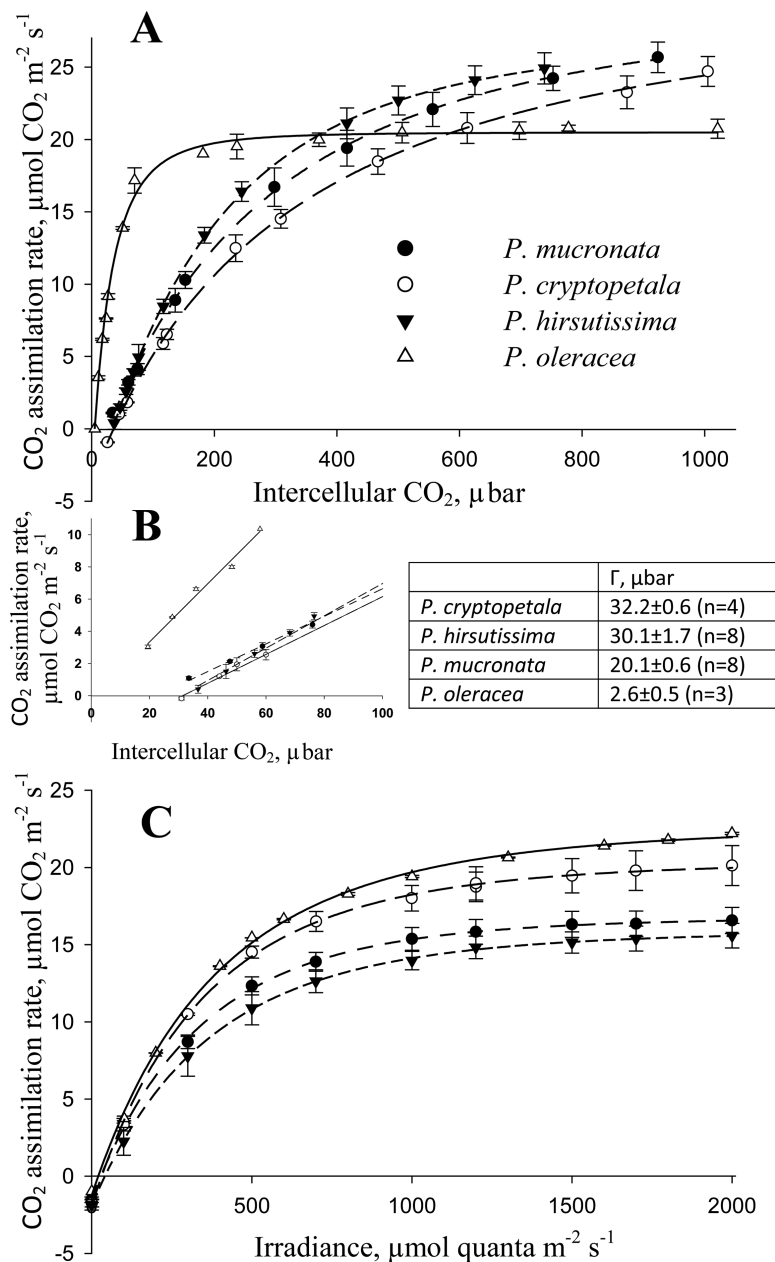

**Fig. 7.** Gas exchange analyses of four *Portulaca* species, *P. cryptopetala*, *P. hirsutissima*, *P. mucronata*, *P. oleracea*. (A) Rates of CO<sub>2</sub> fixation in response to varying intercellular levels of CO<sub>2</sub> at 21% O<sub>2</sub>, 25 °C and 1 000 PPFD. (B) CO<sub>2</sub> compensation point ( $\Gamma$ ) measured at 1 000 PPFD, 21% O<sub>2</sub> and 25 °C. (C) Rates of CO<sub>2</sub> fixation in response to varying light intensities at 21% O<sub>2</sub>, 25 °C and 400  $\mu\text{bar}$  CO<sub>2</sub>. For the CO<sub>2</sub> response curves (panel A), the results represent the average of 3–5 replications (for each replication, mean values were taken from CO<sub>2</sub> response curves measured from high to low, followed by low to high levels of CO<sub>2</sub>). In panel C, the results represent the average of 2–4 replications from measurements made on different leaves (averages were taken from results obtained with changes from high to low light intensity).

distributed in one plane, while *P. hirsutissima* differs in having semi-terete leaves with all lateral VBs distributed under the adaxial epidermis and the main vein underneath, surrounded by WS. In *P. cryptopetala* and *P. mucronata* the distribution of VB is similar to the C<sub>4</sub> species in the Umbraticola clade having Atriplicoid Kranz-anatomy, while in *P. hirsutissima* the leaf anatomy resembles the Portulacelloid-type Kranz-anatomy found in the Australian clade C<sub>4</sub> species (see Fig. 8 for anatomical types).

Most of the C<sub>3</sub>-C<sub>4</sub> intermediate species found in different dicot lineages have a general leaf structural pattern that resembles closely related C<sub>4</sub> species. Most of them have

flattened dorsoventral or isopalisade leaves with enlarged BS cells. This type of anatomy in flattened leaves is characteristic for C<sub>3</sub>-C<sub>4</sub> intermediates in genera *Flaveria* (Holaday *et al.*, 1984b) and *Parthenium* (Moore *et al.*, 1987) in family Asteraceae, in *Euphorbia* in family Euphorbiaceae (Sage *et al.*, 2011), *Heliotropium* in family Boraginaceae (Muhaidat *et al.*, 2011), and *Alternanthera* in family Amaranthaceae (Rajendrudu *et al.*, 1986). They have Kranz-like Atriplicoid-type anatomy as the most advanced stage of evolution from intermediates towards C<sub>4</sub>. This includes several species with C<sub>4</sub>-like photosynthesis (*Flaveria brownii*, Cheng *et al.*, 1988) and two intermediate *Heliotropium* species with Kranz-like

**Table 2.** GenBank accession numbers for samples used in the phylogenetic analysis. -, not available.

| Taxon                                            | ITS      | <i>ndhF</i> | <i>trnT-psbD</i> intergenic spacer | <i>ndhA</i> intron |
|--------------------------------------------------|----------|-------------|------------------------------------|--------------------|
| <b>Portulaca</b>                                 |          |             |                                    |                    |
| <i>P. amillis</i> Speg.                          | JF508527 | JF508674    | JF508757                           | HQ241593           |
| <i>P. bicolor</i> F. Muell.                      | JF508532 | JF508679    | JF508762                           | HQ241594           |
| <i>P. biloba</i> Urb.                            | JF508533 | JF508680    | JF508763                           | JF508613           |
| <i>P. cryptopetala</i> Speg.                     | JF508538 | JF508685    | JF508768                           | HQ241596           |
| <i>P. elatior</i> Mart. ex Rohrb.                | JF508542 | JF508689    | JF508772                           | HQ241598           |
| <i>P. gilliesii</i> Hook.                        | JF508548 | JF508695    | JF508778                           | JF508624           |
| <i>P. grandiflora</i> Hook. cv.                  | JF508550 | JF508697    | JF508780                           | JF508626           |
| <i>P. halimoides</i> L.                          | JF508552 | JF508699    | JF508782                           | JF508627           |
| <i>P. hirsutissima</i> Cambess.                  | KC690150 | -           | -                                  | -                  |
| <i>P. molokiniensis</i> Hobdy                    | JF508562 | JF508709    | JF508792                           | HQ241602           |
| <i>P. mucronata</i> Link                         | KC690151 | -           | -                                  | -                  |
| <i>P. oleracea</i> L.                            | JF508566 | JF508713    | JF508796                           | JF508638           |
| <i>P. pilosa</i> L.                              | JF508585 | JF508732    | JF508815                           | HQ241603           |
| <i>P. smallii</i> P. Wilson                      | JF508595 | JF508742    | JF508825                           | JF508663           |
| <i>P. suffrutescens</i> Engelm.                  | JF508597 | JF508744    | JF508827                           | JF508665           |
| <i>P. umbraticola</i> Kunth cv. 'wildfire mixed' | JF508600 | JF508747    | JF508830                           | JF508668           |
| <b>Outgroup</b>                                  |          |             |                                    |                    |
| <i>Pereskia aculeata</i> Mill.                   | JF508526 | JF508673    | JF508756                           | HQ241587           |
| <i>Talinopsis frutescens</i> A. Gray             | JF508607 | JF508754    | JF508837                           | HQ241613           |
| <i>Talinum paniculatum</i> (Jacq.) Gaertn.       | JF508608 | JF508755    | JF508838                           | HQ241618           |

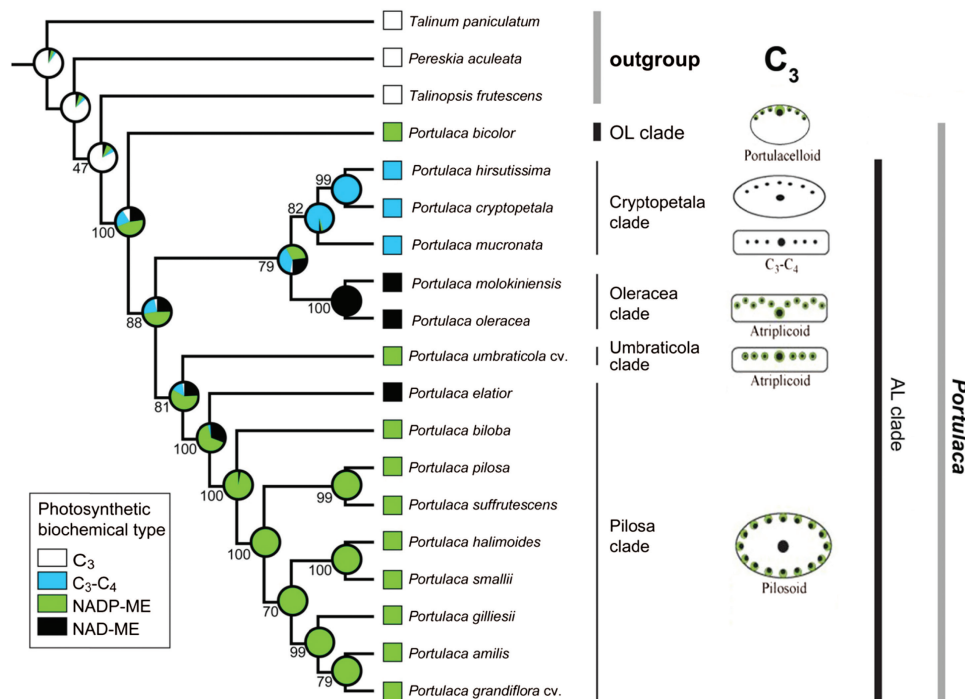**Fig. 8.** Maximum likelihood (ML) estimation of C<sub>4</sub> biochemical variants and C<sub>3</sub>-C<sub>4</sub> intermediacy evolution in *Portulaca*. Proportional likelihoods in the form of a pie chart are shown at each node of the ML reconstruction. Numbers below or above the branches are bootstrap support values derived from a RA×ML analysis. Schematic drawings for illustration of leaf anatomical types are adapted from [Ocampo et al. \(2013\)](#).

anatomy ([Muhaidat et al., 2011](#)). Genera *Moricandia* ([Apel and Ohle, 1979](#); [Holaday and Chollet, 1984a](#)) and *Diplotaxis* ([Ueno et al., 2003](#)) also have intermediate species with similar type of anatomy in flattened leaves; but there are no known C<sub>4</sub> relatives in family Brassicaceae. In family Cleomaceae, the C<sub>3</sub>-C<sub>4</sub> intermediate *Cleome paradoxa* has flattened leaves with isopalisade anatomy with all VB distributed in one plane, Atriplicoid-like ([Voznesenskaya](#)

[et al., 2007](#)). It was suggested to be closer phylogenetically to C<sub>4</sub> *C. angustifolia* which has Glossocardioid Kranz-type leaf anatomy; nevertheless, the phylogenetic position of this species is not far from C<sub>4</sub> *Cleome (Gynandropsis) gynandra* with Atriplicoid-type leaf anatomy ([Feodorova et al., 2010](#)).

In considering intermediates and forms of Kranz in families Chenopodiaceae and Portulacaceae, there is large



diversity in C<sub>4</sub> from Atriplicoid type to forms of Kranz with VB distributed around WS tissue in succulent leaves. In Chenopodiaceae, the type of leaf anatomy in the C<sub>3</sub>-C<sub>4</sub> intermediate *Sedobassia sedoides* resembles the Kranz Kochioid type in C<sub>4</sub> *Bassia* in the positioning of veins with respect to WS tissue and the positioning of BS cells with respect to VB where they are distributed only on the outer side of the lateral VB (Freitag and Kadereit, 2014). Also, Kranz-like Sympegmoid and Kranz-like Salsoloid are C<sub>3</sub>-C<sub>4</sub> intermediate types of leaf anatomy found in *Salsola* s.l. species, which resemble Kranz Salsoloid-type in peripheral distribution of M and positioning of minor veins in a circular pattern around WS tissue in succulent leaves (Voznesenskaya et al., 2013; Schübler et al., in press). In the present study, the leaf anatomy in C<sub>3</sub>-C<sub>4</sub> intermediate *Portulaca* species follow this trend in showing Atriplicoid-like and Portulacelloid-like types of anatomy with related C<sub>4</sub> species having these forms of Kranz anatomy.

#### Cotyledon anatomy

The three Cryptopetala species, which are shown to have C<sub>3</sub>-C<sub>4</sub> intermediate type of anatomy in leaves, all have a similar dorsoventral type of anatomy in cotyledons with centripetally arranged organelles in BS cells. In one species, *P. hirsutissima*, the VB are distributed close to the adaxial epidermis, with greater number of WS spongy parenchyma layers towards the abaxial side, compared to other species with VB distributed in the central lateral plane of the lamina. In closely related families Cleomaceae and Brassicaceae, the C<sub>3</sub>-C<sub>4</sub> intermediates *Cleome paradoxa* and *Moricandia arvensis* also have cotyledons with C<sub>3</sub>-C<sub>4</sub> intermediate anatomy (Rylott et al., 1998; Koteyeva et al., 2011). In other intermediate species (e.g. *Salsola* and *Sedobassia sedoides*, family Chenopodiaceae), the cotyledons have C<sub>3</sub>-type anatomy (Voznesenskaya, Koteyeva, unpublished data). In species where the cotyledons also have intermediate phenotype, this could be advantageous in climates where seedlings are more prone to losses due to photorespiration (warmer climates). In general, intermediate species having C<sub>3</sub>- versus C<sub>3</sub>-C<sub>4</sub>-type photosynthesis in cotyledons may be an example of heterobathmy (Takhtajan, 1959), a phenomenon which results in unequal levels of specialization of different parts of one organism or taxon, achieved during the process of biological evolution.

In five species analyzed in the Pilosa clade, which have Pilosoid Kranz-type in leaves, the cotyledons all have Atriplicoid-like Kranz anatomy with some differences in shape and number of WS spongy layers on the abaxial side. Thus cotyledons in *P. elatior*, *P. biloba*, *P. halimoides* and *P. suffrutescens* have classical Atriplicoid-type anatomy with all Kranz-units (VB surrounded by two layers of chlorenchyma, characteristic for C<sub>4</sub> species, see Peter and Katinas, 2003) distributed in a central plane and one or two layers of spongy parenchyma on the adaxial side. However, in cotyledons of *P. smallii*, all Kranz-units are distributed under the adaxial epidermis with several layers of WS spongy parenchyma underneath. It is easy to imagine that this type of structure could represent a transitional step between

flat-leaved cotyledons with Atriplicoid anatomy to the Pilosoid anatomy characteristic of that in leaves of *P. smallii*. In a previous study, *P. amilis* and *P. grandiflora* in the Pilosa clade, *P. umbraticola* in the Umbraticola clade and *P. oleracea* in the Oleracea clade were shown to have Atriplicoid-like anatomy in cotyledons; however, *P. cf. bicolor* in the OL clade, has, as in leaves, Portulacelloid type anatomy in the cotyledons (Voznesenskaya et al., 2010). In general, all *Portulaca* species examined having Kranz-type anatomy in leaves, also have Kranz anatomy in the cotyledons. As noted by Voznesenskaya et al. (2010), in C<sub>4</sub> dicots that have been analyzed in other families, the anatomy and type of photosynthesis in cotyledons has often been found to be similar to leaves. However, there is diversity with some *Kochia* species having Kochioid-type anatomy in leaves and Atriplicoid-type anatomy in cotyledons and with some *Salsola* species having Salsoloid-type anatomy in leaves with Atriplicoid-type anatomy in cotyledons (Pyankov et al., 1999a, 2000); and some chenopods having Kranz anatomy and C<sub>4</sub> photosynthesis in leaves, with cotyledons having C<sub>3</sub>-type anatomy and biochemistry (Pyankov et al., 1999b, 2000; Voznesenskaya et al., 1999; Lauterbach et al., 2016). These variations are of interest in considering genetic factors that control differences in forms of anatomy and biochemistry that develop in C<sub>4</sub> dicot leaves versus cotyledons.

#### Trends in venation density in leaves

Adaptation of plants to arid environments is often accompanied by an increase in vein density; at the same time it was shown that in most cases vein density decreased with increasing succulence, which is the second structural and/or functional way of plant adaptation to aridity (Ogburn and Edwards, 2013). Both forms of adaptation likely occurred in evolution of types of Kranz anatomy in C<sub>4</sub> species of families Chenopodiaceae and Portulacaceae. Together with the tendency to decrease leaf surface area to volume ratio, most succulents have subterete to terete leaves (more or less roundish in cross section). This leaf shape is often accompanied by development of a 3D type of venation. This pattern helps to maintain the most balanced hydraulic pathway to support photosynthesis by a closer position of veins to chlorenchyma, with a decrease in the path from the vein to leaf surface in thick succulent leaves (Ogburn and Edwards, 2009, 2013). Increased vein density is considered to be one of the crucial factors in the evolution of C<sub>4</sub> photosynthesis in many dicot and grass lineages (Sage et al., 2012). However, studies of venation in representative *Salsola* species with different types of photosynthesis showed there is no significant difference between C<sub>3</sub>, C<sub>3</sub>-C<sub>4</sub> intermediates and C<sub>4</sub> species in vein density, while there is a clear increase in volume of WS tissue (Voznesenskaya et al., 2013).

All *Portulaca* species have succulent leaves that differ in thickness, shape and type of anatomy. In C<sub>4</sub> *Portulaca* lineages there are differences in vein density along with variation in the pattern of vein distribution in different anatomical types, with the highest density in species having Atriplicoid anatomy.

In intermediate *Portulaca* species, the vein density is about 2–2.3 times lower than in some other intermediate species including *Cleome paradoxa* (Marshall et al., 2007), several *Flaveria* intermediates (McKown and Dengler, 2007) and *Salsola divaricata* (Voznesenskaya et al., 2013). This may be explained by the *Portulaca* intermediates having much larger cells in succulent leaves.

In this study, most of the C<sub>4</sub> *Portulaca* species have higher vein density compared to three intermediate species. The species with Atriplicoid type of anatomy from both clades Umbraticola and Oleracea, have the highest vein density among all studied *Portulaca* types (see Fig. 3). Thus in the C<sub>4</sub> Oleracea species, which have modified zig-zag Atriplicoid pattern of venation, the vein densities are ~1.8-fold higher than in the Cryptopetala intermediates (Fig. 3) and are very close to that published for flat-leaved C<sub>4</sub> *Cleome gynandra* (Marshall et al., 2007); however, the densities in the Oleracea species is ~1.5 times lower than in C<sub>4</sub> *Flaveria* (McKown and Dengler, 2007). In C<sub>4</sub> Pilosa species, which have peripheral vein distribution around terete or slightly flattened leaves with WS tissue in the middle, the vein densities were lowest among the C<sub>4</sub> types analyzed. Compared to the intermediates, the vein densities on the adaxial side of the Pilosa species were ~1.3-fold higher than in the Cryptopetala intermediates, while the vein densities on the abaxial side of Pilosa species was similar to that in Cryptopetala intermediates. The Pilosa species may have a lower vein density than the Oleracea species, by having a higher volume of WS tissue and decrease in chlorenchyma tissue.

In contrast to the absence of clear correlation between vein density and the type of photosynthesis in succulent *Salsola* species (Voznesenskaya et al., 2013), in most C<sub>4</sub> *Portulaca* lineages the vein density is higher than in the intermediates. However, among C<sub>4</sub> lineages the vein density depends on the leaf anatomical type, with different patterns of minor veins distribution and/or forms of leaf succulence. In addition, in family Anacamperotaceae, which is closely related to the Portulacaceae, there is a C<sub>3</sub> species *Anacamperos* (*Grahamia coahuilensis* (with weak Crasulacean acid metabolism, Guralnik et al., 2008) that has the same degree of succulence as *P. cryptopetala*, while its vein density is similar to that of C<sub>4</sub> species in the Umbraticola and Pilosa (adaxial side) clades ( $5.0 \pm 0.1 \text{ mm mm}^{-2}$ ; Voznesenskaya and Koteyeva, unpublished data). This further supports the understanding that vein density in succulent lineages is more related to species-specific adaptations than to a progression change from C<sub>3</sub> to C<sub>4</sub> (Voznesenskaya et al., 2013). Further analyses of leaf structure of different photosynthetic phenotypes in *Portulaca*, including vein density, volume of WS tissue and chlorenchyma tissue is needed to consider anatomical adaptations to arid environments.

#### Evolutionary trends in types of photosynthesis

In the study of species in clade Cryptopetala, a variety of *P. cryptopetala* from Uruguay was analyzed (Table 1) in comparison to a variety from Argentina that was previously shown to be a C<sub>3</sub>-C<sub>4</sub> intermediate species (Voznesenskaya

et al., 2010). While there are differences in plant morphology (the size of the plant, thickness and size of the stems and leaves, the size of flowers), the variety used in the current study also has a similar dorsoventral leaf anatomy. Analysis of the other species in the Cryptopetala clade, *P. hirsutissima* and *P. mucronata*, showed they also have C<sub>3</sub>-C<sub>4</sub> anatomy with dorsoventral distribution of chlorenchyma. Microscopy studies show that BS cells in all three species have a substantial number of organelles with chloroplasts and enlarged mitochondria located mainly in a centripetal position. Measurements by gas exchange showed the values of  $\Gamma$  in these three Cryptopetala species (20–32  $\mu\text{bar CO}_2$ ) indicate functionally they are intermediates compared to the representative C<sub>4</sub> species *P. oleracea*, which has a C<sub>4</sub>-type  $\Gamma$  value (2.6  $\mu\text{bar}$ ). Also, *P. cryptopetala* (variety from Argentina) has a  $\Gamma$ , which is intermediate to C<sub>3</sub> (outgroup species *Sesuvium portulacastrum*) and C<sub>4</sub> *Portulaca* (Voznesenskaya et al., 2010). C<sub>4</sub> species typically have  $\Gamma$  values of 0–5  $\mu\text{bar}$ , C<sub>3</sub> species ~60  $\mu\text{bar}$ , and C<sub>3</sub>-C<sub>4</sub> intermediates of 9–35  $\mu\text{bar}$  depending on the species, e.g. Ku et al. (1991), Vogan et al. (2007).

The model for evolution of C<sub>4</sub> plants developed from studies of species having reduced photorespiration consists of a stepwise progression of structural, biochemical and functional changes from C<sub>3</sub> through stages of development of intermediates having a C<sub>2</sub> cycle, followed by intermediates having increased acquisition of the C<sub>4</sub> cycle, to fully functional C<sub>4</sub> photosynthesis (Sage et al., 2012; Voznesenskaya et al., 2013; Schulze et al., 2016). In the C<sub>2</sub> cycle photorespiratory glycine produced in M cells is shuttled to BS cells for decarboxylation by GDC where photorespired CO<sub>2</sub> is concentrated, enhancing its capture by BS Rubisco. In all three Cryptopetala species, GDC is selectively localized in mitochondria of BS cells, which is a distinguishing biochemical feature of intermediate species, while in C<sub>3</sub> species the labeling is distributed about equally between M and BS mitochondria (Rawsthorne et al., 1988). Analyses by western blots of C<sub>4</sub> pathway enzymes showed that PEPC, PDK and NAD-ME were detectable in all three intermediate species in the Cryptopetala clade, but in much lower levels compared to the C<sub>4</sub> species. Also, Voznesenskaya et al. (2010) found the levels of these C<sub>4</sub> enzymes in *P. cryptopetala* (variety from Argentina) were low, similar to the C<sub>3</sub> species *S. portulacastrum*. The results suggest the capacity for C<sub>4</sub> cycle activity in intermediates in this clade is low, which is consistent with leaf biomass having C<sub>3</sub>-like carbon isotope values. Thus, when CO<sub>2</sub> is limiting they may have an increase in their efficiency of photosynthesis primarily by refixing photorespired CO<sub>2</sub> in BS cells by the C<sub>2</sub> cycle, with restricted contribution by a C<sub>4</sub> cycle (Edwards and Ku, 1987; Ku et al., 1991; Rawsthorne and Bauwe, 1998). Whether there is any C<sub>4</sub> cycle activity in these species could be more directly analysed by the method of Alonso-Cantabrana and von Caemmerer (2016) via online measurements of photosynthesis and carbon isotope discrimination. The lack of identification of C<sub>3</sub> and other species that could represent the proposed progression in C<sub>4</sub> evolution in the genus *Portulaca* could suggest they have become extinct or have not yet been discovered.



All the *Portulaca* species in the study from the Pilosa clade were shown to have Kranz-type Pilosoid anatomy. One of them, *P. biloba*, has flattened subterete leaves while *P. cf. gilliesii*, *P. elatior*, *P. halimoides* and *P. smallii* have cylindrical terete leaves. In these species, the lateral VB with Kranz anatomy are distributed around the leaf periphery; while the main vein, which lacks a chlorenchyma sheath, is enclosed by WS tissue located in the central part of the leaf. That type of structure was classified as having multiple simple Kranz units (with many separate VB surrounded by two layers of Kranz tissue) according to classification by Peter and Katinas (2003). A similar leaf anatomy was shown for other representatives of this clade (Voznesenskaya *et al.*, 2010; Ocampo *et al.*, 2013). Some species in this clade were previously shown to have NADP-ME type of C<sub>4</sub> biochemistry (Voznesenskaya *et al.*, 2010); in the present study additional species were shown to be NADP-ME type with one exception. *Portulaca elatior*, with Pilosoid leaf anatomy, was shown to have NAD-ME type of biochemistry, and it represents the earliest-divergent lineage of the Pilosa clade. This was surprising, since NAD-ME subtype was previously associated only with the Oleracea clade while all other C<sub>4</sub> *Portulaca* were considered NADP-ME subtype (Voznesenskaya *et al.*, 2010). The results suggest NAD-ME type of C<sub>4</sub> biochemistry evolved twice within *Portulaca*, once in the Oleracea clade and once in *P. elatior* (Pilosa clade). It suggests evolution of different forms of C<sub>4</sub> is more complex than previously thought. This discovery is consistent with the hypothesis that all photosynthetic modifications within *Portulaca*, including C<sub>3</sub>-C<sub>4</sub> intermediates, were probably derived from C<sub>4</sub> NADP-ME type based on phylogenetic analyses (Fig. 8 and Ocampo *et al.*, 2013). Previously it was shown the dominant form of photosynthesis in *Portulaca* is C<sub>4</sub>, which was possibly lost in species in the Cryptopetala clade. Similar cases, where intermediates are nested within C<sub>4</sub> species, were shown for some clades in Aizoaceae (Bohley *et al.*, 2015) and Salsoleae (Schüßler *et al.*, in press); which might be other cases where reversions from C<sub>4</sub> to intermediates or C<sub>3</sub> occurred. This is in contrast to studies in some families, which support evolution from C<sub>3</sub>-C<sub>4</sub> intermediates to C<sub>4</sub> photosynthesis (see *Leaf anatomy* in evolutionary trends section, this paper, and Sage *et al.*, 2012, 2014). Other studies suggest that a C<sub>3</sub>-C<sub>4</sub> ancestor may have given rise to different C<sub>4</sub> biochemical forms independently in separate lineages (e.g. Christin *et al.*, 2011). This may have been in response to specific environmental conditions, although the adaptive advantages of the different C<sub>4</sub> variations are not well known. Careful large-scale analyses of the distribution of C<sub>3</sub>-C<sub>4</sub> species and closely related C<sub>3</sub> and C<sub>4</sub> lineages showed it is impossible to define a universal ecological C<sub>3</sub>-C<sub>4</sub> niche, nevertheless between different ecological factors temperature is one of the most important driving forces (Lundgren and Christin, in press). Likewise, the diversity within *Portulaca* could be facilitated by development of different photosynthesis strategies in separate lineages from unknown C<sub>3</sub>-C<sub>4</sub> intermediate ancestors; although there is no evidence to support this. Gas exchange analyses indicate the C<sub>3</sub>-C<sub>4</sub> intermediates (which have the CO<sub>2</sub> concentrating C<sub>2</sub> cycle) would be less capable of maintaining their photosynthesis under CO<sub>2</sub> limited conditions than

C<sub>4</sub> species, which have the CO<sub>2</sub> concentrating C<sub>4</sub> cycle. Both intermediates and different Kranz forms of C<sub>4</sub> *Portulaca* have been found to grow together in some locations (Ocampo *et al.*, 2013). Further studies may help to clarify photosynthetic diversification in the different lineages of *Portulaca*, including the potential adaptive advantage of each phenotype based on habitat and seasonal growth cycles.

## Supplementary data

Supplementary data are available at *JXB* online.

S1. Electron microscopy of *in situ* immunolocalization of glycine decarboxylase (GDC) in M (panels A, C, E, G, I) and BS (panels B, D, F, H, J) cells of *Portulaca* species having different types of photosynthesis, and the C<sub>3</sub> outgroup *Sesuvium portulacastrum*. Gold particles in M and BS cells in C<sub>3</sub> *S. portulacastrum* (A, B), C<sub>3</sub>-C<sub>4</sub> *P. hirsutissima* (C, D), C<sub>3</sub>-C<sub>4</sub> *P. mucronata* (E, F), C<sub>3</sub>-C<sub>4</sub> *P. cryptopetala* variety from Uruguay (G, H) and C<sub>4</sub> *P. oleracea* (I, J). Scale bars: 0.2 µm for C, D; 0.5 µm for A, B, E-H. c, chloroplast; m, mitochondria. Also, see Voznesenskaya *et al.*, (2010), which showed selective localization of GDC in mitochondria in BS cells of *P. cryptopetala* variety from Argentina, whereas the C<sub>3</sub> outgroup species *S. portulacastrum* had equivalent labeling in M and BS mitochondria.

## Acknowledgements

This work was supported by the National Science Foundation under funds MCB #1146928 for GE, by the Russian Foundation of Basic Research under Grants 12-04-00721 and 15-04-03665 for EV, NK. We are grateful to the Core Facility Center 'Cell and Molecular Technologies in Plant Science' of Komarov Botanical Institute (St.-Petersburg, Russia) and Franceschi Microscopy and Imaging Center of Washington State University (Pullman, US) for use of their facilities and staff assistance, and to C. Cody for plant growth management. GO acknowledges support by the Programa para el Desarrollo Profesional Docente (PRODEP, Secretaría de Educación Pública, Mexico) under fund #UAA-PTC-169 and by the Universidad Autónoma de Aguascalientes (Aguascalientes, Mexico) under fund #PIB16-3.

## References

- Alonso-Cantabrana H, von Caemmerer S. 2016. Carbon isotope discrimination as a diagnostic tool for C<sub>4</sub> photosynthesis in C<sub>3</sub>-C<sub>4</sub> intermediate species. *Journal of Experimental Botany* **67**, 3109–3121.
- Apel P, Ohle H. 1979. CO<sub>2</sub>-Kompensationspunkt und blattanatomie bei arten der gattung *Moricandia* DC. (Cruciferae). (CO<sub>2</sub> compensation point and leaf anatomy in species of the genus *Moricandia* DC. (Cruciferae)). *Biochemie und Physiologie der Pflanzen* **174**, 68–75.
- Bender MM, Rouhani I, Vines HM, Black CC, Jr. 1973. <sup>13</sup>C/<sup>12</sup>C ratio changes in Crassulacean acid metabolism plants. *Plant Physiology* **52**, 427–430.
- Bohley K, Joos O, Hartmann H, Sage R, Liede-Schumann S, Kadereit G. 2015. Phylogeny of Sesuvioideae (Aizoaceae) – biogeography, leaf anatomy and the evolution of C<sub>4</sub> photosynthesis. *Perspectives in Plant Ecology, Evolution and Systematics* **17**, 116–130.
- Brown RH. 1999. Agronomic implications of C<sub>4</sub> photosynthesis. In: Sage RF, Monson RK, eds. *C<sub>4</sub> plant biology*. San Diego, CA: Academic Press, 473–507.
- Carolin RC, Jacobs SWL, Veski M. 1978. Kranz cells and mesophyll in the Chenopodiales. *Australian Journal of Botany* **26**, 683–698.
- Cheng S-H, Moore BD, Edwards GE, Ku MSB. 1988. Photosynthesis in *Flaveria brownii*, a C<sub>4</sub>-like species: leaf anatomy, characteristics of CO<sub>2</sub>

exchange, compartmentation of photosynthetic enzymes, and metabolism of  $^{14}\text{CO}_2$ . *Plant Physiology* **87**, 867–873.

**Christin PA, Sage T, Edwards E, Ogburn R, Khoshravesh R. SR** 2011. Complex evolutionary transitions and the significance of  $\text{C}_3$ - $\text{C}_4$  intermediate forms of photosynthesis in Molluginaceae. *Evolution* **65**, 643–660.

**Edgar RC.** 2004. MUSCLE: multiple sequence alignment with high accuracy and high throughput. *Nucleic Acids Research* **32**, 1792–1797.

**Edwards GE, Ku MS.** 1987. Biochemistry of  $\text{C}_3$ - $\text{C}_4$  intermediates. *The Biochemistry of Plants* **10**, 275–325.

**Edwards GE, Voznesenskaya EV.** 2011.  $\text{C}_4$  photosynthesis: Kranz forms and single-cell  $\text{C}_4$  in terrestrial plants. In: Raghavendra AS, Sage RF, eds.  $\text{C}_4$  photosynthesis and related  $\text{CO}_2$  concentrating mechanisms. Dordrecht, The Netherlands: Springer, 29–61.

**Edwards GE, Walker DA.** 1983.  $\text{C}_3$ ,  $\text{C}_4$ : mechanisms, and cellular and environmental regulation, of photosynthesis. Oxford: Blackwell Scientific Publications.

**Eggli U, ed.** 2002. Illustrated handbook of succulent plants: dicotyledons. Berlin: Springer.

**Felsenstein J.** 1973. Maximum likelihood and minimum-steps methods for estimating evolutionary trees from data on discrete characters. *Systematic Biology* **22**, 240–249.

**Felsenstein J.** 1985. Confidence limits on phylogenies: an approach using the bootstrap. *Evolution* **39**, 783–791.

**Feodorova TA, Voznesenskaya EV, Edwards GE, Roalson EH.** 2010. Biogeographic patterns of diversification and the origins of  $\text{C}_4$  in *Cleome* (Cleomaceae). *Systematic Botany* **35**, 811–826.

**Freitag H, Kadereit G.** 2014.  $\text{C}_3$  and  $\text{C}_4$  leaf anatomy types in Camphorosmeae (Camphorosmoideae, Chenopodiaceae). *Plant Systematics and Evolution* **300**, 665–687.

**Guralnick LJ, Cline A, Smith M, Sage RF.** 2008. Evolutionary physiology: the extent of  $\text{C}_4$  and CAM photosynthesis in the genera *Anacampseros* and *Grahamia* of the Portulacaceae. *Journal of Experimental Botany* **59**, 1735–1742.

**Gutierrez M, Gracen VE, Edwards GE.** 1974. Biochemical and cytological relationships in  $\text{C}_4$  plants. *Planta* **119**, 279–300.

**Hatch MD.** 1987.  $\text{C}_4$  photosynthesis: a unique blend of modified biochemistry, anatomy and ultrastructure. *Biochimica et Biophysica Acta* **895**, 81–106.

**Hernández-Ledesma P, Berendsohn WG, Borsch T, et al.** 2015. A taxonomic backbone for the global synthesis of species diversity in the angiosperm order Caryophyllales. *Willdenowia* **45**, 281–383.

**Holaday AS, Chollet R.** 1984a. Photosynthetic/photorespiratory characteristics of  $\text{C}_3$ - $\text{C}_4$  intermediate species. *Photosynthesis Research* **5**, 307–323.

**Holaday AS, Lee KW, Chollet R.** 1984b.  $\text{C}_3$ - $\text{C}_4$  intermediate species in the genus *Flaveria*: leaf anatomy, ultrastructure, and the effect of  $\text{O}_2$  on the  $\text{CO}_2$  compensation point. *Planta* **160**, 25–32.

**Kanai R, Edwards G.** 1999. The biochemistry of  $\text{C}_4$  photosynthesis. In: Sage RF, Monson RK, eds.  $\text{C}_4$  Plant Biology. Physiological Ecology series. San Diego: Academic Press, 49–87.

**Koteyeva NK, Voznesenskaya EV, Edwards GE.** 2011. Diversity in forms of  $\text{C}_4$  in genus *Cleome* (Cleomaceae). *Annals of Botany* **107**, 269–283.

**Ku MSB, Wu J, Dai Z, Scott RA, Chu C, Edwards GE.** 1991. Photosynthetic and photorespiratory characteristics of *Flaveria* species. *Plant Physiology* **96**, 518–528.

**Kumar S, Stecher G, Tamura K.** 2016. MEGA7: Molecular Evolutionary Genetics Analysis version 7.0 for bigger datasets. *Molecular Biology and Evolution* **33**, 1870–1874.

**Laetsch WM.** 1971. Chloroplast structural relationships in leaves of  $\text{C}_4$  plants. In: Hatch MD, Osmond CB, Slatyer RO, eds. Photosynthesis and Photorespiration. New York: Wiley-Interscience, 323–349.

**Laetsch WM.** 1974. The  $\text{C}_4$  syndrome: a structural analysis. *Annual Review of Plant Physiology* **25**, 27–52.

**Lauterbach M, Billakurthi K, Kadereit G, Ludwig M, Westhoff P, Gowik U.** 2016.  $\text{C}_3$  cotyledons are followed by  $\text{C}_4$  leaves: intra-individual transcriptome analysis of *Salsola soda* (Chenopodiaceae). *Journal of Experimental Botany*. doi:10.1093/jxb/erw343

**Lewis PO.** 2001. A likelihood approach to estimating phylogeny from discrete morphological character data. *Systematic Biology* **50**, 913–925.

**Long JJ, Berry JO.** 1996. Tissue-specific and light-mediated expression of the  $\text{C}_4$  photosynthetic NAD-dependent malic enzyme of amaranth mitochondria. *Plant Physiology* **112**, 473–482.

**Lundgren MR, Christin P-A.** 2017. Despite phylogenetic effects,  $\text{C}_3$ - $\text{C}_4$  lineages bridge the ecological gap to  $\text{C}_4$  photosynthesis. *Journal of Experimental Botany*, **68**, 241–254.

**Maddison WP, Maddison DR.** 2016. Mesquite: a modular system for evolutionary analysis. Version 3.10. Available at <http://mesquiteproject.org>, accessed 7 November 2016.

**Maier A, Zell MB, Maurino VG.** 2011. Malate decarboxylases: evolution and roles of NAD(P)-ME isoforms in species performing  $\text{C}_4$  and  $\text{C}_3$  photosynthesis. *Journal of Experimental Botany* **62**, 3061–3069.

**Marshall DM, Muhaidat R, Brown NJ, Liu Z, Stanley S, Griffiths H, Sage RF, Hibberd JM.** 2007. *Cleome*, a genus closely related to *Arabidopsis*, contains species spanning a developmental progression from  $\text{C}_3$  to  $\text{C}_4$  photosynthesis. *The Plant Journal* **51**, 886–896.

**Maurino VG, Drincovich MF, Andreo CS.** 1996. NADP-malic enzyme isoforms in maize leaves. *Biochemistry and Molecular Biology International* **38**, 239–250.

**McKown AD, Dengler NG.** 2007. Key innovations in the evolution of Kranz anatomy and  $\text{C}_4$  vein pattern in *Flaveria* (Asteraceae). *American Journal of Botany* **94**, 382–399.

**Moore BD, Franceschi VR, Cheng SH, Wu J, Ku MSB.** 1987. Photosynthetic characteristics of the  $\text{C}_3$ - $\text{C}_4$  intermediate *Parthenium hysterophorus*. *Plant Physiology* **85**, 978–983.

**Muhaidat R, Sage TL, Frohlich MW, Dengler NG, Sage RF.** 2011. Characterization of  $\text{C}_3$ - $\text{C}_4$  intermediate species in the genus *Heliotropium* L. (Boraginaceae): anatomy, ultrastructure and enzyme activity. *Plant, Cell & Environment* **34**, 1723–1736.

**Murata T, Oshugi R, Matsuoka M, Nakamoto M.** 1989. Purification and characterization of NAD Malic enzyme from leaves of *Eleusine coracana* and *Panicum dichotomiflorum*. *Plant Physiology* **89**, 316–324.

**Nyffeler R, Eggli U.** 2010. Disintegrating Portulacaceae: a new familial classification of the suborder Portulacineae (Caryophyllales) based on molecular and morphological data. *Taxon* **59**, 227–240.

**Ocampo G, Columbus JT.** 2010. Molecular phylogenetics of suborder Cactineae (Caryophyllales), including insights into photosynthetic diversification and historical biogeography. *American Journal of Botany* **97**, 1827–1847.

**Ocampo G, Columbus JT.** 2012. Molecular phylogenetics, historical biogeography, and chromosome number evolution of *Portulaca* (Portulacaceae). *Molecular Phylogenetics and Evolution* **63**, 97–112.

**Ocampo G, Koteyeva NK, Voznesenskaya EV, Edwards GE, Sage TL, Sage RF, Columbus JT.** 2013. Evolution of leaf anatomy and photosynthetic pathways in Portulacaceae. *American Journal of Botany* **100**, 2388–2402.

**Ogburn RM, Edwards EJ.** 2009. Anatomical variation in Cactaceae and relatives: trait lability and evolutionary innovation. *American Journal of Botany* **96**, 391–408.

**Ogburn RM, Edwards EJ.** 2013. Repeated origin of three-dimensional leaf venation releases constraints on the evolution of succulence in plants. *Current Biology* **23**, 722–726.

**Peter G, Katinas L.** 2003. A new type of Kranz anatomy in Asteraceae. *Australian Journal of Botany* **51**, 217–226.

**Pyankov VI, Artyusheva EG, Edwards G.** 1999a. Formation of  $\text{C}_4$  syndrome in leaves and cotyledons of *Kochia scoparia* and *Salsola collina* (Chenopodiaceae). *Russian Journal of Plant Physiology* **46**, 452–466.

**Pyankov VI, Black CC, Jr., Artyusheva EG, Voznesenskaya EV, Ku MSB, Edwards GE.** 1999b. Features of photosynthesis in *Haloxylon* species of Chenopodiaceae that are dominant plants in Central Asian deserts. *Plant and Cell Physiology* **40**, 125–134.

**Pyankov VI, Voznesenskaya EV, Kuz'min AN, Ku MSB, Ganko E, Franceschi VR, Black CC, Jr., Edwards GE.** 2000. Occurrence of  $\text{C}_3$  and  $\text{C}_4$  photosynthesis in cotyledons and leaves of *Salsola* species (Chenopodiaceae). *Photosynthesis Research* **63**, 69–84.

**Rajendrudu G, Prasad JSR, Das VSR.** 1986.  $\text{C}_3$ - $\text{C}_4$  intermediate species in *Alternanthera* (Amaranthaceae). Leaf anatomy,  $\text{CO}_2$  compensation point, net  $\text{CO}_2$  exchange and activities of photosynthetic enzymes. *Plant Physiology* **80**, 409–414.



- Rawsthorne S, Bauwe H.** 1998. C<sub>3</sub>-C<sub>4</sub> intermediate photosynthesis. In: Raghavendra AS, ed. *Photosynthesis – a comprehensive treatise*. Cambridge, New York, Melbourne: Cambridge University Press, 150–162.
- Rawsthorne S, Hylton CM, Smith AM, Woolhouse HW.** 1988. Photorespiratory metabolism and immunogold localization of photorespiratory enzymes in leaves of C<sub>3</sub> and C<sub>3</sub>-C<sub>4</sub> intermediate species of *Moricandia*. *Planta* **173**, 298–308.
- Ryllott EL, Metzloff K, Rawsthorne S.** 1998. Developmental and environmental effects on the expression of the C<sub>3</sub>-C<sub>4</sub> intermediate phenotype in *Moricandia arvensis*. *Plant Physiology* **118**, 1277–1284.
- Sage RF.** 2004. The evolution of C<sub>4</sub> photosynthesis. *New Phytologist* **161**, 341–370.
- Sage RF, Khoshravesh R, Sage TL.** 2014. From proto-Kranz to C<sub>4</sub> Kranz: building the bridge to C<sub>4</sub> photosynthesis. *Journal of Experimental Botany* **65**, 3341–3356.
- Sage RF, Sage TL, Kocacinar F.** 2012. Photorespiration and the evolution of C<sub>4</sub> photosynthesis. *Annual Review of Plant Biology* **63**, 19–47.
- Sage TL, Sage RF, Vogan PJ, Rahman B, Johnson DC, Oakley JC, Heckel MA.** 2011. The occurrence of C<sub>2</sub> photosynthesis in *Euphorbia* subgenus *Chamaesyce* (Euphorbiaceae). *Journal of Experimental Botany* **62**, 3183–3195.
- Schulze S, Westhoff P, Gowik U.** 2016. Glycine decarboxylase in C<sub>3</sub>, C<sub>4</sub> and C<sub>3</sub>-C<sub>4</sub> intermediate species. *Current Opinion in Plant Biology* **31**, 29–35.
- Schübler C, Freitag H, Koteyeva N, Voznesenskaya E, Schmidt D, Edwards G, Kadereit G.** 2017. Molecular phylogeny and forms of photosynthesis in tribe Salsoleae (Chenopodiaceae). *Journal of Experimental Botany*, **68**, 207–223.
- Sheehy JE, Mitchell PL, Hardy B.** 2007. *Charting new pathways to C<sub>4</sub> rice*. World Scientific: Singapore.
- Sprey B, Laetsch WM.** 1978. Structural studies of peripheral reticulum in C<sub>4</sub> plant chloroplast of *Portulaca oleracea* L. *Zeitschrift für Pflanzenphysiologie* **87**, 37–53.
- Stamatakis A.** 2006. RAxML-VI-HPC: maximum likelihood-based phylogenetic analyses with thousands of taxa and mixed models. *Bioinformatics* **22**, 2688–2690.
- Takhtajan A.** 1959. *Die Evolution der Angiospermen*. Jena: VEB G. Fischer.
- Thorne RF, Reveal JL.** 2007. An updated classification of the class Magnoliopsida ('Angiospermae'). *Botanical Review* **73**, 67–181.
- Tronconi MA, Fahnenstich H, Gerrard Weehler MC, Andreo CS, Flügge UI, Drincovich MF, Maurino VG.** 2008. Arabidopsis NAD-malic enzyme functions as a homodimer and heterodimer and has a major impact on nocturnal metabolism. *Plant Physiology* **146**, 1540–1552.
- Ueno O, Bang SW, Wada Y, Kondo A, Ishihara K, Kaneko Y, Matsuzawa Y.** 2003. Structural and biochemical dissection of photorespiration in hybrids differing in genome constitution between *Diploaxis tenuifolia* (C<sub>3</sub>-C<sub>4</sub>) and radish (C<sub>3</sub>). *Plant Physiology* **132**, 1550–1559.
- Vogan PJ, Sage RF, Frohlich MW.** 2007. The functional significance of C<sub>3</sub>-C<sub>4</sub> intermediate traits in *Heliotropium* L. (Boraginaceae): gas exchange perspectives. *Plant, Cell & Environment* **30**, 1337–1345.
- Voznesenskaya EV, Franceschi VR, Pyankov VI, Edwards GE.** 1999. Anatomy, chloroplast structure and compartmentation of enzymes relative to photosynthetic mechanisms in leaves and cotyledons of species in the tribe Salsoleae (Chenopodiaceae). *Journal of Experimental Botany* **50**, 1779–1795.
- Voznesenskaya EV, Koteyeva NK, Akhani H, Roalson EH, Edwards GE.** 2013. Structural and physiological analyses in Salsoleae (Chenopodiaceae) indicate multiple transitions among C<sub>3</sub>, intermediate, and C<sub>4</sub> photosynthesis. *Journal of Experimental Botany* **64**, 3583–3604.
- Voznesenskaya EV, Koteyeva NK, Chuong SDX, Ivanova AN, Barroca J, Craven L, Edwards GE.** 2007. Physiological, anatomical and biochemical characterization of the type of photosynthesis in *Cleome* species (Cleomaceae). *Functional Plant Biology* **34**, 247–267.
- Voznesenskaya EV, Koteyeva NK, Edwards GE, Ocampo G.** 2010. Revealing diversity in structural and biochemical forms of C<sub>4</sub> photosynthesis and a C<sub>3</sub>-C<sub>4</sub> intermediate in genus *Portulaca* L. (Portulacaceae). *Journal of Experimental Botany* **61**, 3647–3662.
